# Supplementary material
Source: PubMed Central journal article supplement (PMC2148395)
Supplement: pnas_0705056104_1.pdf [file pnas_0705056104_1.pdf]

**Table 1.** Results of non-parametric likelihood ratio tests (SHT), showing the topologies tested, their likelihood scores, and the significance of the difference in likelihood score as compared to the best tree. Significances of  $P < 0.05$  are marked with an asterisk.

|    | Description of tree permutation                                                                                 | Likelihood (-lnL) | P value |
|----|-----------------------------------------------------------------------------------------------------------------|-------------------|---------|
| 1  | best ML tree                                                                                                    | 25447.86913       | ----    |
| 2  | <i>Karsenia</i> sister to <i>Aneides</i>                                                                        | 25455.66648       | 0.7035  |
| 3  | <i>Karsenia</i> sister to ( <i>Phaeognathus</i> + <i>Desmognathus</i> )                                         | 25455.77661       | 0.6990  |
| 4  | <i>Karsenia</i> sister to ( <i>Ensatina</i><br>(( <i>Phaeogathus</i> + <i>Desmognathus</i> )+ <i>Aneides</i> )) | 25454.80029       | 0.8435  |
| 5  | <i>Karsenia</i> sister to <i>Ensatina</i>                                                                       | 25464.95178       | 0.4905  |
| 6  | <i>Karsenia</i> sister to <i>Plethodon</i>                                                                      | 25468.46811       | 0.4000  |
| 7  | <i>Karsenia</i> sister to clade B (see results)                                                                 | 25465.61581       | 0.4905  |
| 8  | ( <i>Atylodes</i> + <i>Speleomantes</i> ) sister to<br>( <i>Karsenia</i> + <i>Hydromantes</i> )                 | 25525.00450       | 0.0025* |
| 9  | <i>Hydromantes</i> sister to<br>( <i>Karsenia</i> ( <i>Atylodes</i> + <i>Speleomantes</i> ))                    | 25525.00450       | 0.0025* |
| 10 | <i>Atylodes</i> sister to ( <i>Hydromantes</i> + <i>Speleomantes</i> )                                          | 25517.15431       | 0.0065* |
| 11 | Eastern <i>Plethodon</i> sister to (Western <i>Plethodon</i> +<br><i>Aneides</i> )                              | 25555.51378       | 0.0000* |
