# Supplementary material
Source: PubMed Central journal article supplement (PMC2148395)
Supplement: pnas_0705056104_2.pdf [file pnas_0705056104_2.pdf]

**Table 2.** Comparison of divergence time estimates calculated in MULTIDIVTIME (see methods). Values represent mya, and minimum and maximum values correspond to the 95% confidence interval of time estimation. Two of the several combinations tested in the analyses are shown, one with maximum divergence times constrained in the nodes Aves - Squamata and Aves - Alligatoridae, and the other without these constraints using only the minimum age proposed by Müller & Reisz<sup>1</sup>. Hedges *et al.*<sup>2</sup>, in response to Müller & Reisz<sup>1</sup>, proposed not to use maximum divergences on these nodes because they could underestimate divergence times in the whole tree. However, our analyses suggest that whether or not one constrains those nodes has no effect on the estimated ages in the rest of the tree. Nevertheless, without the maximum constraints, the ages of the bird - crocodylian split under the two estimates overlap, while the bird - squamate split without the maximum divergence is ca. 30 mya older. This suggests that the most conservative scenario is to follow Hedges *et al.*<sup>2</sup> in this case, not constraining this node, which should be tested in the future with a robust and comprehensive tetrapod phylogeny.

| Taxonomic content                                                   | With maximum fossil constraints |    |     |     | Without maximum fossil constraints |    |     |     |
|---------------------------------------------------------------------|---------------------------------|----|-----|-----|------------------------------------|----|-----|-----|
|                                                                     | Mean                            | SD | Min | Max | Mean                               | SD | Min | Max |
| <i>H.brunus</i> - <i>H.platicephalus</i>                            | 4                               | 3  | 0   | 11  | 4                                  | 3  | 0   | 11  |
| <i>H.shastae</i> - ( <i>H.brunus</i> + <i>H.platicephalus</i> )     | 8                               | 4  | 2   | 16  | 8                                  | 4  | 2   | 17  |
| <i>Atylodes</i> - <i>Speleomantes</i>                               | 16                              | 3  | 14  | 24  | 17                                 | 3  | 14  | 24  |
| Small - Big Eastern <i>Plethodon</i>                                | 17                              | 5  | 8   | 29  | 18                                 | 6  | 8   | 30  |
| Central - Western <i>Aneides</i>                                    | 26                              | 6  | 15  | 39  | 26                                 | 7  | 15  | 41  |
| <i>Stereochilus</i> - <i>Pseudotriton</i>                           | 31                              | 7  | 18  | 47  | 32                                 | 8  | 19  | 49  |
| Eastern- Central <i>Aneides</i>                                     | 35                              | 7  | 22  | 50  | 36                                 | 8  | 22  | 52  |
| Eastern - Western <i>Plethodon</i>                                  | 39                              | 8  | 25  | 56  | 40                                 | 8  | 26  | 59  |
| <i>Gyrinophilus</i> - ( <i>Pseudotriton</i> + <i>Stereochilus</i> ) | 40                              | 8  | 27  | 57  | 42                                 | 8  | 27  | 60  |
| <i>Hydromantes</i> - ( <i>Speleomantes</i> + <i>Atylodes</i> )      | 41                              | 7  | 28  | 57  | 41                                 | 8  | 28  | 58  |
| <i>Desmognathus</i> - <i>Phaeognathus</i>                           | 46                              | 8  | 31  | 62  | 47                                 | 8  | 32  | 65  |
| <i>Eurycea</i> - <i>Gyrinophilus</i>                                | 48                              | 9  | 33  | 66  | 50                                 | 9  | 34  | 69  |
| <i>Pleurodeles</i> - <i>Tylotriton</i>                              | 49                              | 4  | 44  | 60  | 49                                 | 5  | 44  | 61  |
| <i>Aneides</i> - ( <i>Desmognathus</i> - <i>Phaeognathus</i> )      | 51                              | 8  | 36  | 68  | 52                                 | 9  | 37  | 71  |

|                                                                                  |     |    |     |     |     |    |     |     |
|----------------------------------------------------------------------------------|-----|----|-----|-----|-----|----|-----|-----|
| <i>Ensatina</i> - ( <i>Aneides</i> , <i>Phaeognathus</i> + <i>Desmognathus</i> ) | 61  | 9  | 45  | 80  | 63  | 9  | 46  | 83  |
| <i>Plethodon</i> - <i>Ensatina</i>                                               | 67  | 9  | 50  | 86  | 69  | 10 | 51  | 89  |
| <i>Karsenia</i> – Sg. <i>Hydromantes</i>                                         | 67  | 9  | 50  | 87  | 69  | 10 | 51  | 90  |
| <i>Bolitoglossa</i> - <i>Batrachoseps</i>                                        | 73  | 11 | 53  | 96  | 75  | 11 | 55  | 99  |
| ( <i>Karsenia</i> + <i>Hydromantes</i> ) - other Plethodontinae                  | 74  | 10 | 57  | 95  | 77  | 10 | 58  | 98  |
| <i>Hemidactylum</i> - ( <i>Batrachoseps</i> + <i>Bolitoglossa</i> )              | 84  | 11 | 64  | 107 | 87  | 11 | 67  | 110 |
| Spelerpinae - ( <i>Bolitoglossinae</i> + <i>Hemidactylum</i> )                   | 88  | 11 | 68  | 111 | 91  | 11 | 70  | 114 |
| Plethodontinae – Hemidactylinii                                                  | 94  | 11 | 74  | 117 | 96  | 11 | 76  | 120 |
| <i>Dicamptodon</i> - <i>Ambystoma</i>                                            | 134 | 15 | 106 | 164 | 137 | 15 | 109 | 168 |
| <i>Amphiuma</i> - Plethodontidae                                                 | 146 | 14 | 120 | 176 | 150 | 15 | 122 | 180 |
| <i>Hynobiidae</i> - <i>Cryptobranchidae</i>                                      | 167 | 10 | 155 | 192 | 169 | 11 | 156 | 195 |
| Rhyacotritonidae - ( <i>Amphiumidae</i> + Plethodontidae)                        | 168 | 14 | 141 | 197 | 172 | 14 | 145 | 201 |
| Pipidae - Ascaphidae                                                             | 179 | 19 | 146 | 218 | 181 | 19 | 146 | 220 |
| Salamandridae - ( <i>Ambystomatidae</i> + <i>Dicamptodontidae</i> )              | 188 | 15 | 160 | 218 | 192 | 15 | 163 | 222 |
| ( <i>Hynobiidae</i> + <i>Cryptobranchidae</i> ) - other salamanders              | 227 | 13 | 203 | 254 | 230 | 13 | 206 | 258 |
| Aves - Alligatoridae                                                             | 246 | 2  | 243 | 250 | 251 | 7  | 243 | 268 |
| Aves - Squamata                                                                  | 255 | 1  | 252 | 257 | 283 | 12 | 261 | 307 |
| Anura - Caudata                                                                  | 322 | 14 | 293 | 349 | 324 | 14 | 295 | 350 |
| Theropsida - Sauropsida                                                          | 328 | 9  | 312 | 344 | 333 | 8  | 315 | 344 |
| Amniota - Amphibia                                                               | 350 | 6  | 336 | 359 | 351 | 6  | 337 | 360 |
