# Supplementary material
Source: PubMed Central journal article supplement (PMC2148395)
Supplement: pnas_0705056104_3.pdf [file pnas_0705056104_3.pdf]

**Table 3.** Voucher specimens, Museum of Vertebrate Zoology number (MVZ), and Genbank accession numbers.

| Museum number | Taxa                              | POMC     | BDNF     | RAG      |
|---------------|-----------------------------------|----------|----------|----------|
| ---           | <i>Alligator mississippiensis</i> | EU275842 | EU275888 | AF143724 |
| 132964        | <i>Ambystoma rosaceum</i>         | EU275841 | EU275887 | AY583345 |
| 241480        | <i>Amphiuma tridactylum</i>       | EU275817 | EU275863 | AY650128 |
| 204245        | <i>Andrias davidianus</i>         | EU275843 | EU275889 | AY650142 |
| 158353        | <i>Aneides aeneus</i>             | EU275844 | EU275890 | AY691701 |
| 219942        | <i>Aneides ferreus</i>            | EU275845 | EU275891 | EU275805 |
| 170983        | <i>Aneides flavipunctatus</i>     | EU275848 | EU275894 | EU275808 |
| 219973        | <i>Aneides flavipunctatus</i>     | EU275849 | EU275895 | EU275809 |
| 226110        | <i>Aneides hardii</i>             | EU275811 | EU275857 | EU275780 |
| 249828        | <i>Aneides lugubris</i>           | EU275847 | EU275893 | EU275807 |
| 220991        | <i>Aneides vagrans</i>            | EU275846 | EU275892 | EU275806 |
| 187732        | <i>Ascaphus truei</i>             | EU275850 | EU275896 | AY323754 |
| ---           | <i>Atylodes genei</i>             | EU275840 | EU275886 | EU275804 |
| 156447        | <i>Batrachoseps major</i>         | EU275855 | EU275901 | AY650126 |
| 225875        | <i>Bolitoglossa sp. nov.</i>      | EU275851 | EU275897 | EU275810 |
| 145017        | <i>Desmognathus brimleyorum</i>   | EU275819 | EU275865 | EU275786 |
| 224931        | <i>Desmognathus fuscus</i>        | EU275812 | EU275858 | EU275781 |
| 192601        | <i>Dicamptodon tenebrosus</i>     | EU275824 | EU275870 | EU275789 |
| 236171        | <i>Ensatina eschscholtzii</i>     | EU275816 | EU275862 | EU275785 |
| 225074        | <i>Eurycea bislineata</i>         | EU275815 | EU275861 | EU275784 |
| ---           | <i>Gallus gallus</i>              | 71895056 | DQ124361 | AF143730 |
| 173504        | <i>Gyrinophilus porphyriticus</i> | EU275853 | EU275899 | AY583349 |
| 225078        | <i>Hemidactylium scutatum</i>     | EU275852 | EU275898 | AY691711 |
| ---           | <i>Homo sapiens</i>               | BT019918 | X60201   | NM000448 |
| 238576        | <i>Hydromantes brunus</i>         | EU275825 | EU275871 | EU275790 |
| 240733        | <i>Hydromantes platicephalus</i>  | EU275828 | EU275874 | EU275793 |
| 230651        | <i>Hydromantes shastae</i>        | EU275829 | EU275875 | EU275794 |
| 197240        | <i>Hynobius sonani</i>            | EU275818 | EU275864 | AY650144 |
| 246033        | <i>Karsenia koreana</i>           | EU275822 | EU275868 | AY887135 |
| 173507        | <i>Phaeognathus hubrichti</i>     | EU275814 | EU275860 | EU275783 |
| 220003        | <i>Plethodon elongatus</i>        | EU275836 | EU275882 | AY650120 |
| 215255        | <i>Plethodon fourchensis</i>      | EU275838 | EU275884 | EU275802 |
| 137290        | <i>Plethodon hoffmani</i>         | EU275837 | EU275883 | EU275801 |
| 206567        | <i>Plethodon jordani</i>          | EU275835 | EU275881 | EU275800 |
| ---           | <i>Plethodon larselli</i>         | EU275839 | EU275885 | EU275803 |
| 145037        | <i>Plethodon ouachitae</i>        | EU275831 | EU275877 | EU275796 |
| 215256        | <i>Plethodon serratus</i>         | EU275830 | EU275876 | EU275795 |
| 206570        | <i>Plethodon teyahalee</i>        | EU275834 | EU275880 | EU275799 |
| 236241        | <i>Plethodon vandykei</i>         | EU275833 | EU275879 | EU275798 |
| 225739        | <i>Plethodon yonahlossee</i>      | EU275832 | EU275878 | EU275797 |
| 235673        | <i>Pleurodeles poireti</i>        | EU275820 | EU275866 | EU275787 |
| ---           | <i>Protopterus sp.</i>            | 4760914  | EU275856 | AY442928 |
| 137304        | <i>Pseudotriton ruber</i>         | EU275854 | EU275900 | AY650123 |
| 222581        | <i>Rhyacotriton variegatus</i>    | EU275823 | EU275869 | AY691693 |
| 163996        | <i>Speleomantes italicus</i>      | EU275826 | EU275872 | EU275791 |
| 163997        | <i>Speleomantes italicus</i>      | EU275827 | EU275873 | EU275792 |
| ---           | Squamata                          | AB128826 | DQ385335 | AY662590 |
| 233227        | <i>Stereochilus marginatus</i>    | EU275813 | EU275859 | EU275782 |
| 236638        | <i>Tylotriton wenxianensis</i>    | EU275821 | EU275867 | EU275788 |
| ---           | <i>Xenopus laevis</i>             | X05940   | EF035623 | L19324   |
