# Supplementary material
Source: PubMed Central journal article supplement (PMC2148395)
Supplement: pnas_0705056104_4.pdf [file pnas_0705056104_4.pdf]

**Table 4.** Best-fitting models of evolution and parameters selected for each codon position with hierarchical likelihood methods. Codon positions with similar model and model parameters were regrouped into the same partition<sup>3</sup>. Symbols and abbreviations represent:  $\Pi$ , frequency of base; *Tratio*, transition / transversion ratio; *rmat*, rate matrix; *PInvar*, proportion of invariable sites; *alpha*, shape of gamma distribution.

| Gene | Codon position | Length | $\pi$ A | $\pi$ C | $\pi$ G | Best model | Tratio or Rmat         | alpha | Pinvar | Partition number |
|------|----------------|--------|---------|---------|---------|------------|------------------------|-------|--------|------------------|
| POMC | 1              | 160    | 0.30    | 0.23    | 0.34    | TVM+G      | (2.9 2.1 0.9 0.8 2.1)  | 0.64  | 0      | 1                |
|      | 2              | 160    | 0.40    | 0.17    | 0.27    | GTR+G      | (2.4 2.9 1.6 3.5 6.9)  | 0.50  | 0      | 2                |
|      | 3              | 160    | 0.30    | 0.22    | 0.34    | TVM+G      | (3.4 2.4 1.1 0.9 2.4)  | 0.63  | 0      | 1                |
| BDNF | 1              | 235    | 0.29    | 0.20    | 0.31    | GTR+G      | (4.7 3.2 1.9 0.9 13.8) | 0.32  | 0      | 3                |
|      | 2              | 236    | 0.25    | 0.25    | 0.25    | TrNef+I    | (1.0 4.2 1.0 1.0 1.3)  | 0.02  | 0.75   | 4                |
|      | 3              | 236    | 0.25    | 0.25    | 0.25    | SYM+G      | 2.95                   | 0.93  | 0      | 5                |
| RAG1 | 1              | 485    | 0.32    | 0.21    | 0.27    | GTR+I+G    | (2.3 1.8 0.9 0.8 3.8)  | 0.94  | 0.39   | 6                |
|      | 2              | 485    | 0.35    | 0.20    | 0.16    | GTR+I+G    | (2.1 8.9 1.5 5.6 3.5)  | 0.64  | 0.57   | 7                |
|      | 3              | 486    | 0.27    | 0.24    | 0.22    | TrN+I+G    | (1.0 4.8 1.0 1.0 5.6)  | 3.72  | 0.02   | 8                |

Primers developed for this study: BDNF\_DRV\_F1: 5'-ACCATCCTTTTCCTKACTATGG-3'; BDNF\_DRV\_R1: 5'-CTATCTCCCCTTTTAATGGTC-3'; POMC\_DRV\_F1: 5'-ATATGTCATGASCCAYTTYCGCTGGAA-3'; POMC\_DRV\_R1: 5'-GGCRTTYTTGAAWAGATCATTAGWGG-3'; RAG\_DRV\_PIF: 5'-ACAACTGGACGRCAGATTTTCCAGCC-3'; RAG\_DRV\_PIR: 5'-GTGATGCTTCAGCACATCCTC-3'.
